# Supplementary material for: Estrogen receptor alpha somatic mutations Y537S and D538G confer breast cancer endocrine resistance by stabilizing the activating function-2 binding conformation
Source: eLife journal article supplement (doi:10.7554/elife.12792), 2016-02-02

| Sequence                | Start | End | Charge | WT± E2  | WT± SRC3 | WT± E2+ SRC3 | WT± 5-TOT |
|-------------------------|-------|-----|--------|---------|----------|--------------|-----------|
| GSSHHHHHSSGLVPRGSHMNSLA | 283   | 307 | 3      | 1 (4)*  | -1 (3)*  | 1 (3)*       | 0 (2)*    |
| LSLTADQ                 | 308   | 314 | 1      | -7 (3)  | 2 (6)*   | -2 (9)*      | -1 (4)*   |
| TADQMVSAL               | 311   | 319 | 1      | -16 (3) | -1 (7)*  | -9 (6)       | -28 (4)   |
| MVSAL                   | 315   | 319 | 1      | -27 (3) | -16 (6)  | -10 (4)      | -42 (4)   |
| DAEPPIL                 | 320   | 327 | 1      | -26 (3) | -17 (8)  | -21 (6)      | -35 (5)   |
| DAEPPIL                 | 321   | 327 | 1      | -29 (3) | -16 (8)  | -21 (6)      | -33 (5)   |
| YSEYDPTTRPFSE           | 328   | 339 | 2      | -27 (3) | 0 (6)*   | -1 (7)*      | 0 (3)*    |
| YSEYDPTTRPFSEASM        | 328   | 342 | 2      | 2 (6)*  | -1 (6)*  | 0 (5)*       | 0 (3)*    |
| MGLLTNL                 | 343   | 349 | 1      | 2 (7)*  | -22 (8)  | -27 (4)      | -71 (8)   |
| ADRELVHMINWAKRVPGF      | 350   | 367 | 5      | -31 (4) | -6 (4)   | -2 (1)*      | -15 (3)   |
| ADRELVHMINWAKRVPGFVD    | 350   | 369 | 3      | -11 (1) | -5 (5)   | -3 (3)*      | -14 (2)   |
| ADRELVHMINWAKRVPGFVDL   | 350   | 370 | 3      | -8 (1)  | -4 (3)*  | -4 (2)*      | -15 (2)   |
| LVHMINWAKRVPGF          | 354   | 367 | 4      | -7 (5)  | -2 (2)*  | -1 (1)*      | -6 (3)    |
| INWAKRVPGF              | 358   | 367 | 2      | -2 (1)* | -1 (1)*  | 0 (1)*       | -7 (5)    |
| VDLTLDQGVHLE            | 368   | 378 | 2      | -1 (1)* | 1 (4)*   | -1 (2)*      | 0 (3)*    |
| VDLTLDQGVHLE            | 370   | 380 | 3      | 3 (2)*  | 0 (2)*   | 0 (2)*       | -1 (1)*   |
| LTLHDQGVHLE             | 373   | 380 | 2      | 2 (2)*  | 1 (2)*   | 0 (1)*       | 0 (1)*    |
| HDQGVHLE                | 374   | 388 | 2      | 2 (2)*  | -1 (1)*  | 0 (1)*       | -1 (1)*   |
| LELM                    | 384   | 388 | 1      | 2 (0)*  | -1 (1)*  | 0 (0)*       | -2 (1)*   |
| ELMI                    | 385   | 389 | 1      | -1 (2)* | -1 (1)*  | 0 (0)*       | -2 (1)*   |
| LVWRSMHPGKL             | 391   | 402 | 3      | -1 (2)* | -7 (3)   | -2 (3)*      | -15 (2)   |
| LVWRSMHPGKLIF           | 391   | 404 | 3      | -9 (2)  | -7 (4)   | -2 (3)*      | -19 (1)   |
| LVWRSMHPGKLIFAPNL       | 391   | 408 | 3      | -12 (2) | -11 (5)  | -3 (2)*      | -22 (3)   |
| LVWRSMHPGKLIFAPNLL      | 391   | 409 | 3      | -16 (2) | -8 (4)   | -4 (3)*      | -16 (2)   |
| VWRSMHPGKL              | 392   | 402 | 3      | -17 (2) | -7 (3)   | -3 (3)*      | -17 (2)   |
| VWRSMHPGKLIFAPNLL       | 392   | 410 | 3      | -19 (2) | -8 (4)   | -4 (3)*      | -23 (9)   |
| LFAPNL                  | 403   | 408 | 1      | -17 (2) | -13 (6)  | -6 (5)       | -41 (2)   |
| LFAPNLL                 | 403   | 410 | 2      | -26 (3) | -14 (7)  | -5 (4)       | -29 (4)   |
| LLDRNQKCKVEGM           | 409   | 421 | 3      | -23 (3) | 0 (5)*   | -12 (5)      | -2 (3)*   |
| LDRNQKCKVEGM            | 410   | 421 | 3      | -8 (5)  | -2 (6)*  | -16 (7)      | -1 (2)*   |
| DRNQKCKVEGMVE           | 411   | 423 | 2      | -10 (6) | -3 (7)*  | -17 (8)      | -1 (5)*   |
| MVEIF                   | 421   | 425 | 1      | -15 (2) | -8 (4)   | -2 (1)*      | 4 (4)*    |
| VEIFDML                 | 422   | 428 | 1      | -28 (2) | -12 (5)  | -7 (1)       | 3 (4)*    |
| LATSSRF                 | 429   | 435 | 2      | -4 (2)* | -3 (4)*  | -1 (3)*      | -11 (5)   |
| LATSSRFMR               | 429   | 437 | 2      | -2 (2)* | -3 (4)*  | -1 (2)*      | -10 (5)   |
| RMMNLQGEEF              | 436   | 445 | 2      | -1 (2)* | -3 (4)*  | -1 (4)*      | -4 (3)*   |
| KSIL                    | 449   | 453 | 1      | 0 (0)*  | -1 (2)*  | 0 (1)*       | -1 (2)*   |
| ILLNSGV                 | 451   | 458 | 1      | -1 (2)* | 4 (5)*   | 0 (2)*       | -4 (3)*   |
| LNSGVYTFI               | 454   | 462 | 1      | -1 (6)* | -2 (5)*  | -1 (5)*      | -2 (4)*   |
| SSTLSLEEKDHIHRLDKITDTL  | 463   | 486 | 3      | 0 (3)*  | -1 (3)*  | 0 (2)*       | -1 (2)*   |
| KSLEEKDHIHRLDKITDTL     | 467   | 486 | 3      | 1 (2)*  | 0 (3)*   | 0 (2)*       | -4 (4)*   |
| IHLMAKAGLTQQQHRL        | 487   | 504 | 3      | 1 (2)*  | 1 (5)*   | -1 (6)*      | -1 (3)*   |
| MAKAGLTQQQHRL           | 490   | 504 | 3      | 2 (3)*  | 2 (6)*   | -1 (5)*      | -2 (1)*   |
| LLLSHHRHMSNKGMEHL       | 508   | 525 | 3      | -14 (2) | -9 (3)   | -7 (1)       | -20 (2)   |
| ILSHHRHMSNKGMEHL        | 509   | 525 | 4      | -16 (1) | -9 (3)   | -7 (1)       | -21 (2)   |
| ILSHHRHMSNKGMEHL        | 510   | 525 | 3      | -16 (1) | -10 (3)  | -7 (1)       | -22 (2)   |
| YSMKOKVPLVDLL           | 526   | 540 | 3      | 2 (5)*  | 1 (7)*   | -19 (7)      | 0 (5)*    |
| KOKVPLVDLL              | 529   | 540 | 3      | 2 (4)*  | 2 (7)*   | -16 (7)      | 2 (4)*    |
| LLEML                   | 540   | 544 | 1      | 0 (3)*  | -1 (1)*  | 0 (0)*       | -2 (1)*   |
| LEMILDAHRLHAPTS         | 541   | 554 | 3      | 0 (5)*  | -8 (5)   | -10 (5)      | 1 (5)*    |
| EMILDAHRLHAPTS          | 542   | 554 | 2      | 0 (5)*  | -1 (5)*  | -7 (5)       | 0 (3)*    |
| MLDAHRLHAPTS            | 543   | 554 | 3      | 2 (6)*  | -2 (5)*  | -6 (5)       | 0 (4)*    |
| LDHRLHAPTS              | 544   | 554 | 2      | 2 (6)*  | -2 (5)*  | -4 (5)*      | 0 (3)*    |
| DAHRLHAPTS              | 545   | 554 | 2      | 2 (6)*  | 0 (6)*   | -2 (6)*      | 0 (4)*    |

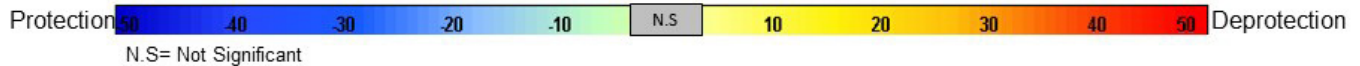

Supplement: supp [file elife_poa_e12792_Figure_7_figure_supplement_4.pdf › elife_poa_e12792_Figure_7_figure_supplement_4.pdf]
