# Supplementary material for: Estrogen receptor alpha somatic mutations Y537S and D538G confer breast cancer endocrine resistance by stabilizing the activating function-2 binding conformation
Source: eLife journal article supplement (doi:10.7554/elife.12792), 2016-02-02

| Sequence                 | Start | End | Charge | Y537S ± E2 | Y537S ± SRC3 | Y537S ± (E2+SRC3) | Y537S ± 5-TOT |
|--------------------------|-------|-----|--------|------------|--------------|-------------------|---------------|
| TADQMVSAL                | 311   | 319 | 1      | -12 (7)    | -25 (6)      | -10 (6)           | -21 (9)       |
| MVSALL                   | 315   | 320 | 1      | -21 (8)    | -44 (8)      | -24 (7)           | -33 (10)      |
| LDAEPPIL                 | 320   | 327 | 1      | -21 (8)    | -37 (7)      | -12 (6)           | -21 (6)       |
| DAEPPIL                  | 321   | 327 | 1      | -22 (9)    | -37 (7)      | -8 (6)            | -22 (7)       |
| YSEYDPTTRPFSEASM         | 328   | 342 | 2      | 1 (5)*     | -1 (6)*      | 5 (4)             | 3 (9)*        |
| MGLLTNL                  | 343   | 349 | 2      | -30 (5)    | -44 (6)      | -24 (7)           | -26 (9)       |
| GLLTNL                   | 344   | 349 | 1      | -30 (6)    | -41 (6)      | -20 (6)           | -31 (6)       |
| LTNLADRELVHMINWAKRVPGF   | 346   | 367 | 3      | -11 (4)    | -15 (4)      | -11 (4)           | -15 (5)       |
| ADRELVHMINWAKRVPGF       | 350   | 367 | 4      | -6 (4)     | -11 (3)      | -7 (3)            | -9 (3)        |
| ADRELVHMINWAKRVPGFVD     | 350   | 369 | 3      | -4 (3)*    | -10 (3)      | -7 (3)            | -8 (4)        |
| ADRELVHMINWAKRVPGFVDL    | 350   | 370 | 3      | -5 (4)*    | -10 (3)      | -7 (3)            | -8 (4)        |
| LVHMINW                  | 354   | 360 | 2      | -3 (3)*    | -10 (3)      | -11 (3)           | -7 (3)        |
| VDLTLD                   | 368   | 374 | 2      | 4 (6)*     | -7 (5)       | -6 (4)            | -2 (6)*       |
| VDLTLDQVHLE              | 368   | 380 | 3      | 4 (5)*     | -5 (3)       | -5 (2)*           | -6 (4)        |
| LTLDQVHLE                | 370   | 380 | 2      | 4 (4)*     | -4 (2)*      | -3 (2)*           | -4 (3)*       |
| HDQVHLE                  | 373   | 380 | 2      | 2 (4)*     | -4 (1)*      | -4 (2)*           | -4 (3)*       |
| LVWRSMHPGKL              | 391   | 402 | 3      | -6 (5)     | -7 (4)       | -6 (3)            | -7 (4)        |
| LVWRSMHPGKLFF            | 391   | 404 | 3      | -7 (5)     | -8 (4)       | -8 (4)            | -8 (4)        |
| LVWRSMHPGKLFFAPNLL       | 391   | 409 | 3      | -9 (6)     | -11 (4)      | -8 (5)            | -10 (5)       |
| VWRSMHPGKL               | 392   | 402 | 3      | -6 (5)     | -7 (4)       | -7 (3)            | -7 (3)        |
| VWRSMHPGKLFFAPNLL        | 392   | 410 | 3      | -9 (6)     | -11 (4)      | -8 (5)            | -10 (4)       |
| LFAPNL                   | 403   | 408 | 1      | -13 (7)    | -20 (6)      | -16 (5)           | -17 (5)       |
| LFAPNLL                  | 403   | 410 | 2      | -10 (6)    | -15 (6)      | -13 (5)           | -14 (7)       |
| LLDRNGKCEVG              | 409   | 420 | 2      | -9 (7)     | -15 (5)      | -1 (6)*           | 0 (8)*        |
| LLDRNGKCEVGMVE           | 409   | 423 | 3      | -8 (6)     | -13 (6)      | -1 (6)*           | 0 (7)*        |
| LLDRNGKCEVG              | 410   | 420 | 2      | -9 (8)     | -16 (7)      | -4 (4)*           | 0 (9)*        |
| MVEIF                    | 421   | 425 | 1      | -7 (3)     | -9 (2)       | -6 (2)            | 4 (4)*        |
| MVEIFDML                 | 421   | 428 | 1      | -10 (5)    | -13 (4)      | -7 (5)            | 6 (8)         |
| VEIFDML                  | 422   | 428 | 1      | -12 (3)    | -18 (4)      | -9 (5)            | 7 (6)         |
| LATSSRF                  | 429   | 435 | 2      | -5 (9)*    | -6 (5)       | -2 (4)*           | -9 (9)        |
| LATSSRFMR                | 429   | 437 | 2      | -4 (7)*    | -5 (3)*      | -2 (3)*           | -8 (7)        |
| LATSSRFMRMNLQGEEF        | 429   | 445 | 3      | -3 (5)*    | -3 (3)*      | -2 (3)*           | -6 (6)        |
| ATSSRFMRMNLQGE           | 430   | 444 | 3      | -3 (6)*    | -5 (4)       | -1 (3)*           | -7 (7)        |
| RMMNLQGEEF               | 436   | 445 | 2      | -3 (6)*    | -4 (3)*      | -2 (4)*           | -7 (8)        |
| KSIL                     | 449   | 453 | 1      | -1 (2)*    | -2 (2)*      | 0 (1)*            | -3 (4)*       |
| LNSGVYTF                 | 454   | 462 | 1      | 2 (5)*     | -1 (5)*      | 0 (5)*            | 3 (7)*        |
| TFLSSTL                  | 460   | 466 | 1      | 2 (3)*     | 1 (5)*       | 2 (4)*            | 4 (10)*       |
| SSTLKSLEEKDHIHRVLDKITDTL | 463   | 486 | 3      | 1 (3)*     | -1 (3)*      | 0 (2)*            | 0 (4)*        |
| KSLEEKDHIHRVLDKITDTL     | 467   | 486 | 3      | 1 (4)*     | 0 (5)*       | 1 (3)*            | -2 (3)*       |
| IHLMAKAGLTQQQHQLAQL      | 487   | 507 | 3      | 2 (4)*     | 1 (4)*       | 3 (2)*            | -1 (3)*       |
| LILSHIRHMSNKGMEHL        | 508   | 525 | 3      | -10 (4)    | -12 (2)      | -10 (2)           | -9 (9)        |
| LILSHIRHMSNKGMEHL        | 509   | 525 | 2      | -11 (4)    | -12 (3)      | -10 (2)           | -8 (9)        |
| LILSHIRHMSNKGMEHL        | 509   | 525 | 4      | -11 (4)    | -13 (3)      | -11 (3)           | -9 (9)        |
| ILSHIRHMSNKGMEHL         | 510   | 525 | 3      | -12 (4)    | -13 (3)      | -12 (3)           | -10 (10)      |
| YSMKCKNVVPLSDLL          | 526   | 540 | 2      | -7 (7)     | -18 (8)      | -8 (5)            | 8 (7)         |
| YSMKCKNVVPLSDLL          | 526   | 540 | 3      | -7 (7)     | -19 (7)      | -8 (4)            | 8 (9)         |
| LLEML                    | 540   | 544 | 1      | -6 (6)     | -22 (5)      | -23 (3)           | 3 (9)*        |
| LEMLDA                   | 541   | 546 | 1      | -21 (10)   | -43 (6)      | -35 (6)           | 7 (9)         |
| EMLDAHRLHAPTS            | 542   | 554 | 2      | -4 (6)*    | -9 (5)       | -6 (4)            | 3 (8)*        |
| DAHRLHAPTS               | 545   | 554 | 2      | 1 (4)*     | -1 (5)*      | 1 (4)*            | 3 (7)*        |
| HRLHAPTS                 | 547   | 554 | 2      | 2 (4)*     | 0 (5)*       | 1 (4)*            | 1 (8)*        |

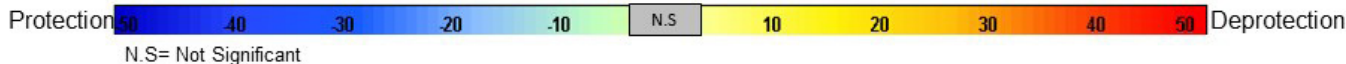

Supplement: supp [file elife_poa_e12792_Figure_7_figure_supplement_5.pdf › elife_poa_e12792_Figure_7_figure_supplement_5.pdf]
