# Supplementary material for: Estrogen receptor alpha somatic mutations Y537S and D538G confer breast cancer endocrine resistance by stabilizing the activating function-2 binding conformation
Source: eLife journal article supplement (doi:10.7554/elife.12792), 2016-02-02
Supplement: supp [file elife-12792-supp-v2.zip]

Archive with 23 entries (23 files):
- elife_poa_e12792_Figure_7_figure_supplement_2.pdf
- elife_poa_e12792_Figure_5_figure_supplement_2.pdf
- elife_poa_e12792_Figure_4_figure_supplement_4.pdf
- elife_poa_e12792_Figure_6_table_supplement_1.pdf
- elife_poa_e12792_Figure_1_figure_supplement_1.pdf
- elife_poa_e12792_Figure_4_figure_supplement_5.pdf
- elife_poa_e12792_Figure_5_figure_supplement_3.pdf
- elife_poa_e12792_Figure_4_figure_supplement_9.pdf
- elife_poa_e12792_Figure_7_figure_supplement_3.pdf
- elife_poa_e12792_Figure_7_figure_supplement_1.pdf
- elife_poa_e12792_Figure_4_figure_supplement_12.pdf
- elife_poa_e12792_Figure_4_figure_supplement_3.pdf
- elife_poa_e12792_Figure_4_figure_supplement_2.pdf
- elife_poa_e12792_Figure_4_figure_supplement_1.pdf
- elife_poa_e12792_Figure_4_figure_supplement_10.pdf
- elife_poa_e12792_Figure_4_figure_supplement_6.pdf
- elife_poa_e12792_Figure_7_figure_supplement_4.pdf
- elife_poa_e12792_Figure_4_figure_supplement_11.pdf
- elife_poa_e12792_Figure_4_figure_supplement_7.pdf
- elife_poa_e12792_Figure_5_figure_supplement_1.pdf
- elife_poa_e12792_Figure_7_figure_supplement_5.pdf
- elife_poa_e12792_Figure_4_figure_supplement_8.pdf
- elife_poa_e12792_Figure_7_figure_supplement_6.pdf
