# Supplementary material for: Estrogen receptor alpha somatic mutations Y537S and D538G confer breast cancer endocrine resistance by stabilizing the activating function-2 binding conformation
Source: eLife journal article supplement (doi:10.7554/elife.12792), 2016-02-02
Supplement: supp [file elife_poa_e12792_Figure_6_table_supplement_1.pdf › elife_poa_e12792_Figure_6_table_supplement_1.pdf]

| HIS Residue Number | Monomer A | Monomer B |
|--------------------|-----------|-----------|
| 356                | HSE       | HSD       |
| 373                | HSD       | HSE       |
| 377                | HSE       | HSD       |
| 398                | HSP       | HSP       |
| 474                | HSE       | HSE       |
| 476                | HSE       | HSE       |
| 488                | HSE       | HSE       |
| 501                | HSD       | HSE       |
| 513                | HSD       | HSD       |
| 516                | HSE       | HSE       |
| 524                | HSE       | HSE       |
| 547                | HSE       | HSE       |
