# Supplementary material for: Estrogen receptor alpha somatic mutations Y537S and D538G confer breast cancer endocrine resistance by stabilizing the activating function-2 binding conformation
Source: eLife journal article supplement (doi:10.7554/elife.12792), 2016-02-02
Supplement: supp [file elife_poa_e12792_Figure_7_figure_supplement_6.pdf › elife_poa_e12792_Figure_7_figure_supplement_6.pdf]

| Sequence              | Start | End | Charge | D538G ± E2 | D538G ± SRC3 | D538G ± (E2+SRC3) | D538G ± 5-TOT |
|-----------------------|-------|-----|--------|------------|--------------|-------------------|---------------|
| LSLTADQM              | 308   | 315 | 1      | -4 (6)*    | -2 (6)*      | -5 (5)*           | -3 (7)*       |
| TADQMVSAL             | 311   | 319 | 1      | -14 (8)    | -13 (6)      | -20 (7)           | -20 (10)      |
| LDAPPIIL              | 320   | 327 | 1      | -25 (8)    | -18 (6)      | -37 (7)           | -27 (12)      |
| DAEPIIL               | 321   | 327 | 1      | -24 (8)    | -18 (6)      | -36 (6)           | -28 (9)       |
| YSEYDTPRFSE           | 328   | 339 | 2      | -3 (6)*    | 4 (5)*       | -1 (5)*           | 2 (8)*        |
| YSEYDTPRFSEASM        | 328   | 342 | 2      | -5 (6)*    | 1 (6)*       | -2 (5)*           | 0 (9)*        |
| MGLLTNL               | 343   | 349 | 2      | -30 (7)    | -23 (6)      | -38 (5)           | -20 (8)       |
| GLLTNL                | 344   | 349 | 1      | -28 (8)    | -24 (6)      | -40 (5)           | -23 (11)      |
| ADRELVHMINW           | 350   | 360 | 2      | -8 (8)     | -9 (4)       | -14 (8)           | -6 (6)        |
| ADRELVHMINWAKR/PGF    | 350   | 367 | 4      | -7 (4)     | -6 (3)       | -10 (5)           | -5 (4)*       |
| ADRELVHMINWAKR/PGFYD  | 350   | 369 | 3      | -6 (4)     | -6 (4)       | -9 (5)            | -5 (5)*       |
| ADRELVHMINWAKR/PGFYDL | 350   | 370 | 3      | -5 (4)     | -5 (3)       | -7 (3)            | -4 (5)*       |
| LVHMINW               | 354   | 360 | 2      | -4 (3)*    | -6 (1)       | -7 (3)            | -4 (4)*       |
| LVHMINWAKR/PGF        | 354   | 367 | 4      | -1 (5)*    | -4 (3)*      | -6 (7)            | -3 (4)*       |
| LVHMINWAKR/PGFYDL     | 354   | 370 | 3      | -2 (3)*    | -4 (4)*      | -6 (4)            | -2 (4)*       |
| INWAKR/PGF            | 358   | 367 | 2      | -1 (2)*    | -2 (2)*      | -3 (3)*           | -2 (3)*       |
| VDLTLD                | 368   | 374 | 2      | 0 (5)*     | -3 (5)*      | -4 (4)*           | -2 (8)*       |
| VDLTLDQVHL            | 368   | 378 | 3      | 2 (6)*     | 0 (2)*       | -4 (3)*           | -4 (6)*       |
| VDLTLDQVHLL           | 368   | 380 | 2      | 1 (5)*     | -1 (2)*      | -2 (3)*           | -3 (5)*       |
| LTLDQVHLL             | 370   | 380 | 3      | 1 (3)*     | 0 (2)*       | -1 (3)*           | -2 (4)*       |
| TLDQVHLL              | 371   | 380 | 3      | 1 (3)*     | -3 (3)*      | -2 (2)*           | -2 (3)*       |
| HDQVHLL               | 373   | 380 | 2      | 1 (3)*     | -2 (2)*      | -2 (2)*           | -1 (2)*       |
| QVHLL                 | 375   | 380 | 2      | 1 (2)*     | -2 (3)*      | -2 (2)*           | -1 (2)*       |
| LEILM                 | 384   | 388 | 1      | 0 (1)*     | 0 (0)*       | 0 (2)*            | 0 (3)*        |
| EILMI                 | 385   | 389 | 1      | 0 (1)*     | 0 (0)*       | 0 (2)*            | 0 (3)*        |
| IGLVWRSMEHPGKL        | 389   | 402 | 3      | -4 (3)*    | -5 (4)*      | -7 (3)            | -5 (7)*       |
| LVWRSMEHPGKL          | 391   | 402 | 3      | -6 (4)     | -6 (4)       | -9 (4)            | -5 (9)        |
| LVWRSMEHPGKLLF        | 391   | 404 | 3      | -5 (4)     | -6 (5)       | -9 (5)            | -7 (8)        |
| LVWRSMEHPGKLLFAPNL    | 391   | 408 | 3      | -8 (5)     | -8 (7)       | -13 (6)           | -6 (7)        |
| VWRSMEHPGKLLFAPNLLL   | 392   | 410 | 3      | -9 (5)     | -8 (6)       | -9 (5)            | -6 (9)        |
| LFAPNL                | 403   | 408 | 1      | -14 (5)    | -14 (5)      | -19 (6)           | -16 (11)      |
| LFAPNLL               | 403   | 409 | 2      | -10 (4)    | -12 (6)      | -16 (7)           | -10 (9)       |
| LFAPNLLL              | 403   | 410 | 2      | -12 (6)    | -11 (5)      | -15 (4)           | -13 (9)       |
| LLDRNGKCVG            | 409   | 420 | 3      | -16 (7)    | -2 (6)*      | -14 (4)           | 1 (8)*        |
| LLDRNGKCVGEMVE        | 409   | 423 | 3      | -15 (7)    | 0 (6)*       | -13 (5)           | -1 (9)*       |
| LDNRNGKCVGEM          | 410   | 421 | 3      | -17 (8)    | -2 (6)*      | -17 (5)           | 0 (8)*        |
| DRNGKCVGEMVE          | 411   | 423 | 2      | -16 (8)    | -2 (6)*      | -18 (5)           | -2 (11)*      |
| MVEIF                 | 421   | 425 | 1      | -6 (2)     | 4 (4)*       | -8 (3)            | 5 (4)         |
| VEIFDML               | 422   | 428 | 1      | -12 (5)    | -6 (3)       | -16 (4)           | 7 (5)         |
| LATSSRF/FRM           | 429   | 437 | 2      | -4 (6)*    | -4 (7)*      | -6 (6)            | -4 (6)*       |
| LATSSRF/FRMNLQGE      | 429   | 444 | 3      | -3 (4)*    | 0 (10)*      | -4 (8)*           | -7 (7)        |
| LATSSRF/FRMNLQGEF     | 429   | 445 | 3      | -2 (4)*    | -3 (6)*      | -4 (5)*           | -3 (6)*       |
| RMMNLQGEF             | 436   | 445 | 2      | -2 (9)*    | -5 (5)       | -6 (4)            | -5 (8)*       |
| KSIIL                 | 449   | 453 | 1      | -1 (2)*    | -2 (4)*      | -3 (5)*           | -4 (8)*       |
| IILLNSGV              | 451   | 458 | 1      | -1 (5)*    | -1 (4)*      | -4 (3)*           | -4 (10)*      |
| LNSGVYTF              | 454   | 462 | 1      | -3 (5)*    | 0 (5)*       | -3 (4)*           | 2 (5)*        |
| TFLSSTL               | 460   | 466 | 1      | -2 (8)*    | 4 (6)*       | 2 (5)*            | 5 (8)*        |
| SSTLKSLEEKDIHRLDKITD  | 463   | 486 | 3      | -2 (3)*    | -1 (3)*      | -1 (2)*           | -2 (6)*       |
| KSLEEKDIHRLDKITD      | 467   | 486 | 3      | -1 (5)*    | 0 (3)*       | -1 (3)*           | -1 (6)*       |
| IHLMAKAGLTQQGHQRL     | 487   | 504 | 3      | -1 (5)*    | 1 (4)*       | 0 (4)*            | -2 (7)*       |
| IHLMAKAGLTQQGHQRLAQL  | 487   | 507 | 3      | 0 (4)*     | 1 (3)*       | 1 (3)*            | -2 (5)*       |
| MAKAGLTQQGHQRL        | 490   | 504 | 4      | -1 (5)*    | 0 (5)*       | 0 (4)*            | -3 (7)*       |
| LILSHIRHMSNKGMEHL     | 509   | 525 | 4      | -7 (3)     | -9 (3)       | -12 (3)           | -9 (7)        |
| ILSHIRHMSNKGMEHL      | 510   | 525 | 3      | -7 (3)     | -9 (5)       | -13 (4)           | -9 (8)        |
| SHIRHMSNKGMEHL        | 512   | 525 | 2      | -8 (4)     | -10 (5)      | -13 (4)           | -10 (7)       |
| YSMKCKNVVPLYGLL       | 526   | 540 | 3      | -14 (9)    | 1 (5)*       | -16 (4)           | 1 (9)*        |
| KCKNVVPLYGLL          | 529   | 540 | 3      | -12 (8)    | -2 (6)*      | -13 (4)           | 0 (7)*        |
| LLEML                 | 540   | 544 | 1      | 0 (1)*     | 0 (0)*       | -1 (5)*           | 0 (2)*        |
| LEMLDA                | 541   | 546 | 1      | -23 (7)    | -23 (6)      | -42 (6)           | -4 (11)*      |
| LEMLDAHRLHAPTS        | 541   | 554 | 3      | -11 (5)    | -8 (3)       | -16 (3)           | 0 (5)*        |
| LDHRLHAPTS            | 544   | 554 | 2      | -5 (5)*    | -1 (5)*      | -6 (4)            | 2 (5)*        |
| DAHRLHAPTS            | 545   | 554 | 3      | -3 (5)*    | 2 (5)*       | -1 (4)*           | 3 (4)*        |
| HRLHAPTS              | 547   | 554 | 2      | -2 (5)*    | 1 (5)*       | 1 (5)*            | 3 (5)*        |

Protection  Deprotection  
 N.S= Not Significant
