# Supplementary figures and images for: Estrogen receptor alpha somatic mutations Y537S and D538G confer breast cancer endocrine resistance by stabilizing the activating function-2 binding conformation
Source: eLife journal article supplement (doi:10.7554/elife.12792), 2016-02-02

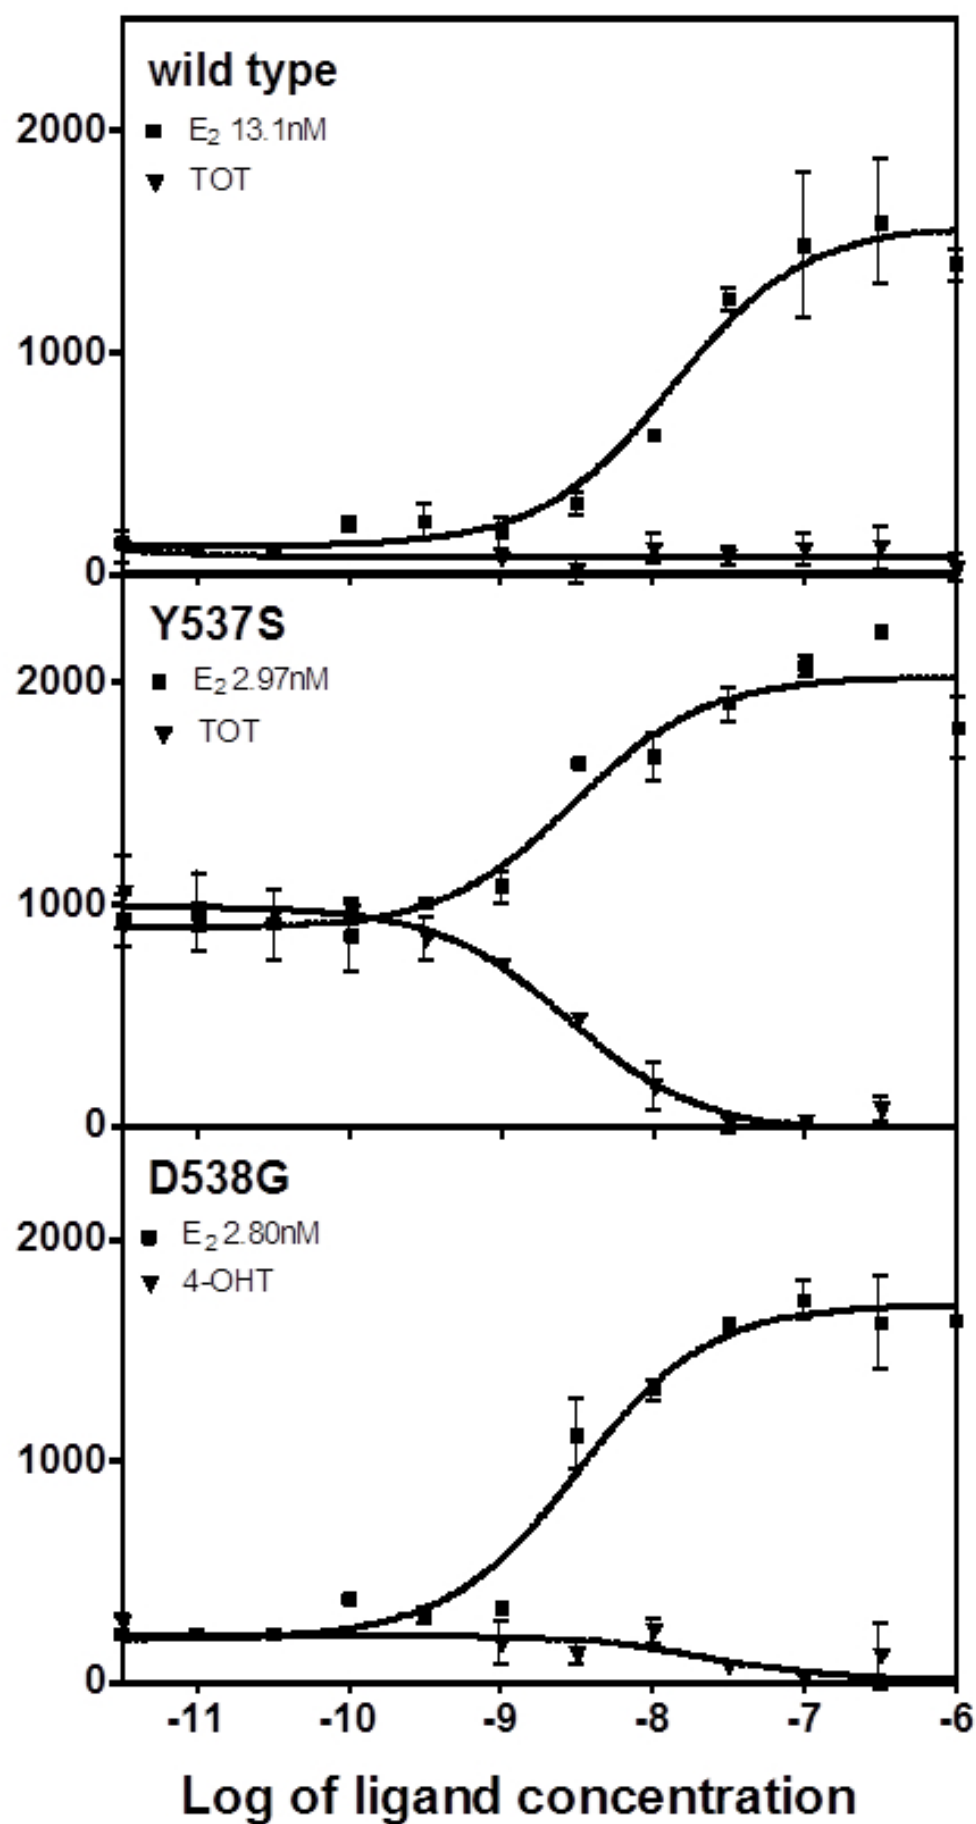

Supplement: supp [file elife_poa_e12792_Figure_1_figure_supplement_1.pdf › elife_poa_e12792_Figure_1_figure_supplement_1.pdf]

WT-E2

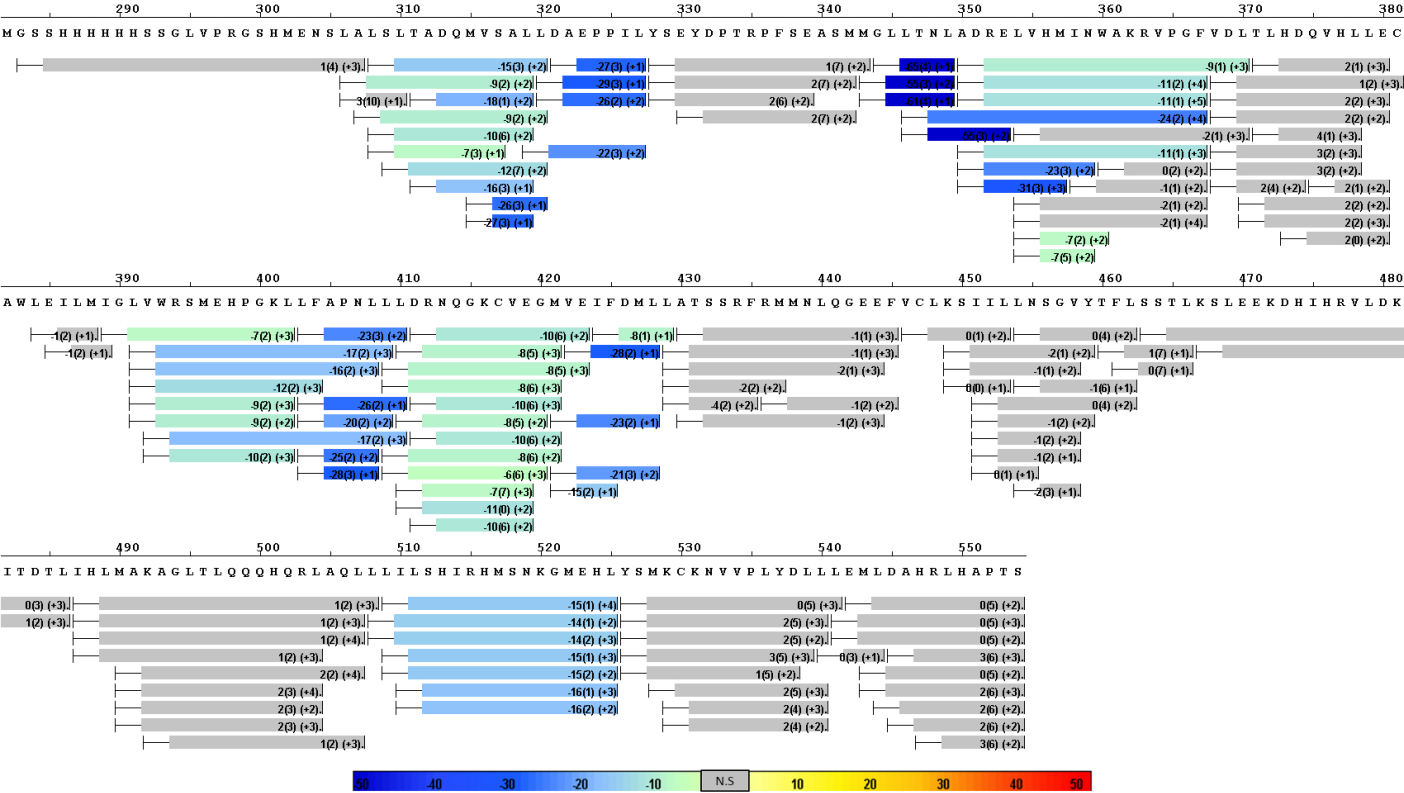

Supplement: supp [file elife_poa_e12792_Figure_4_figure_supplement_1.pdf › elife_poa_e12792_Figure_4_figure_supplement_1.pdf]

Y537S-E2-SRC3

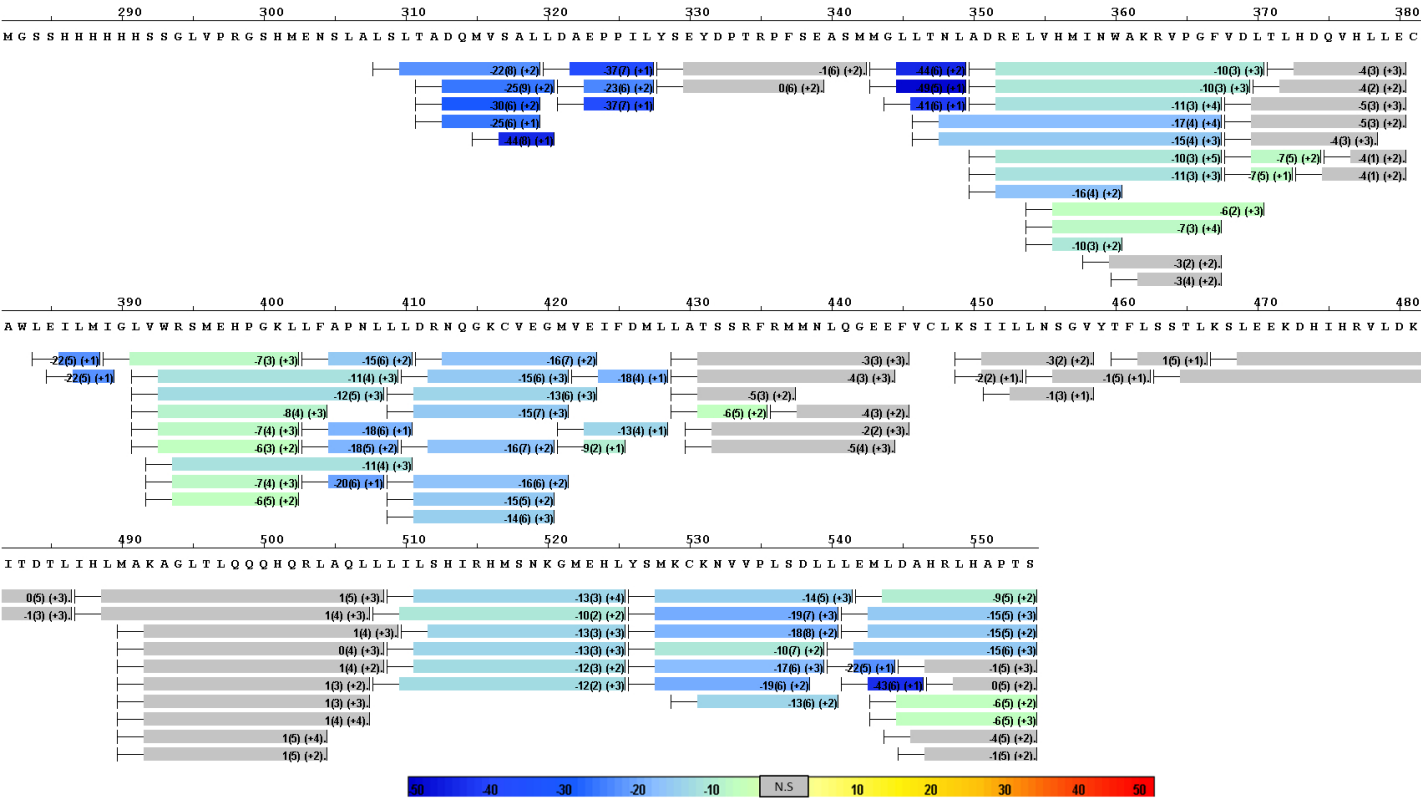

Supplement: supp [file elife_poa_e12792_Figure_4_figure_supplement_10.pdf › elife_poa_e12792_Figure_4_figure_supplement_10.pdf]

D538G-E2-SRC3

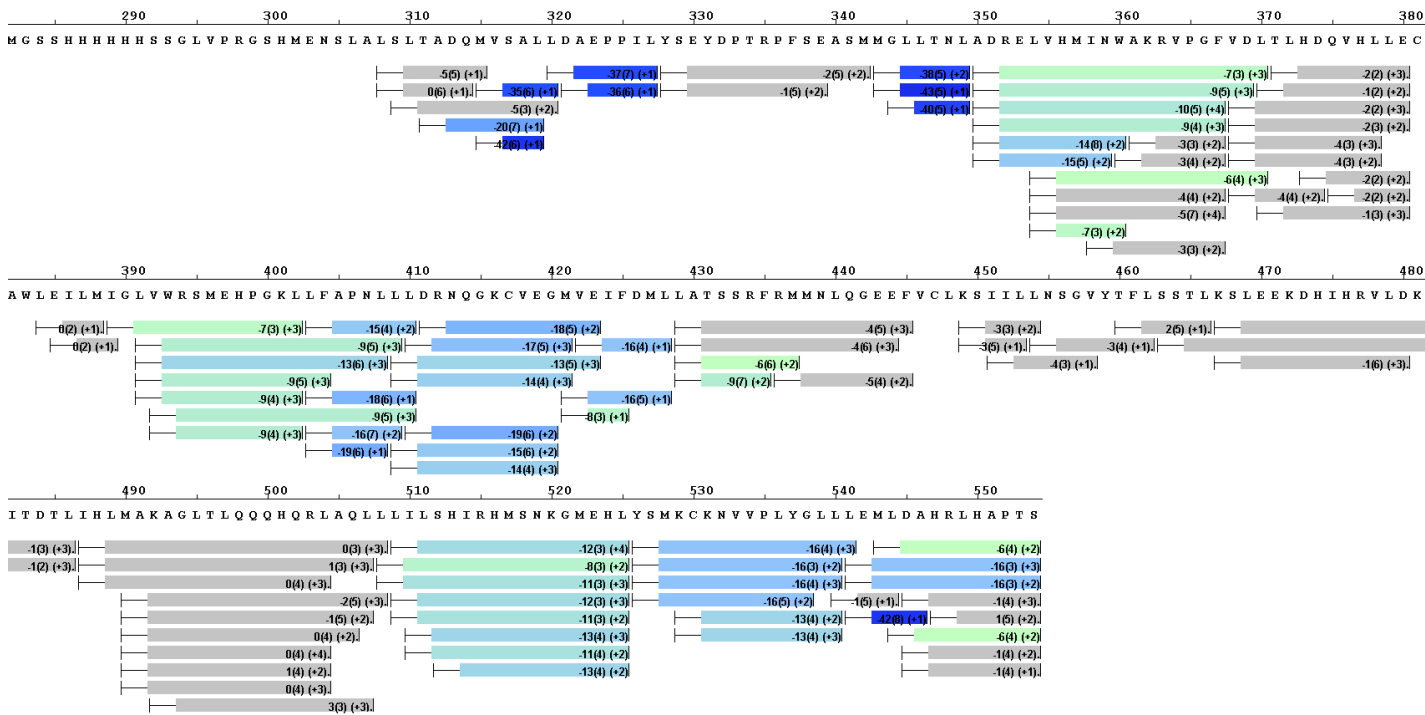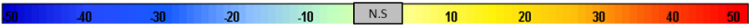

Supplement: supp [file elife_poa_e12792_Figure_4_figure_supplement_11.pdf › elife_poa_e12792_Figure_4_figure_supplement_11.pdf]

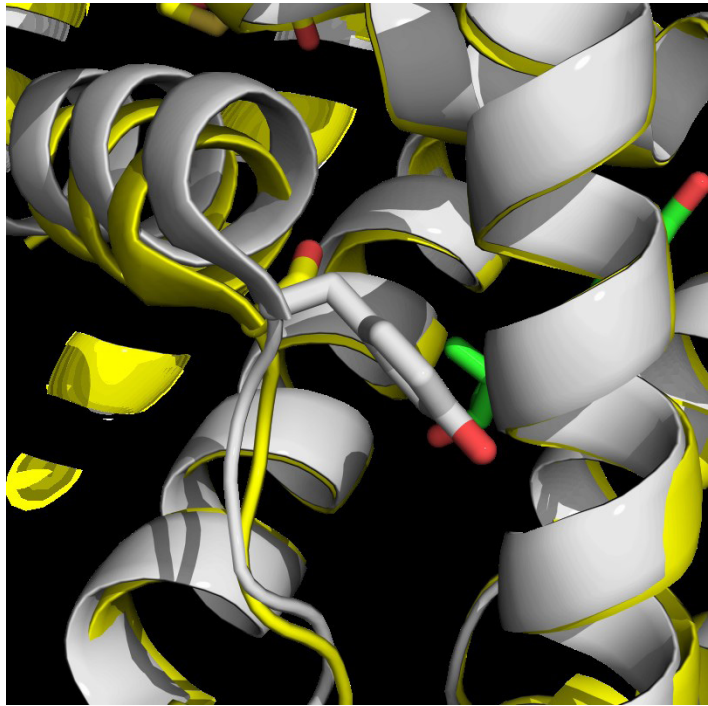

Supplement: supp [file elife_poa_e12792_Figure_4_figure_supplement_12.pdf › elife_poa_e12792_Figure_4_figure_supplement_12.pdf]

Y537S-E2

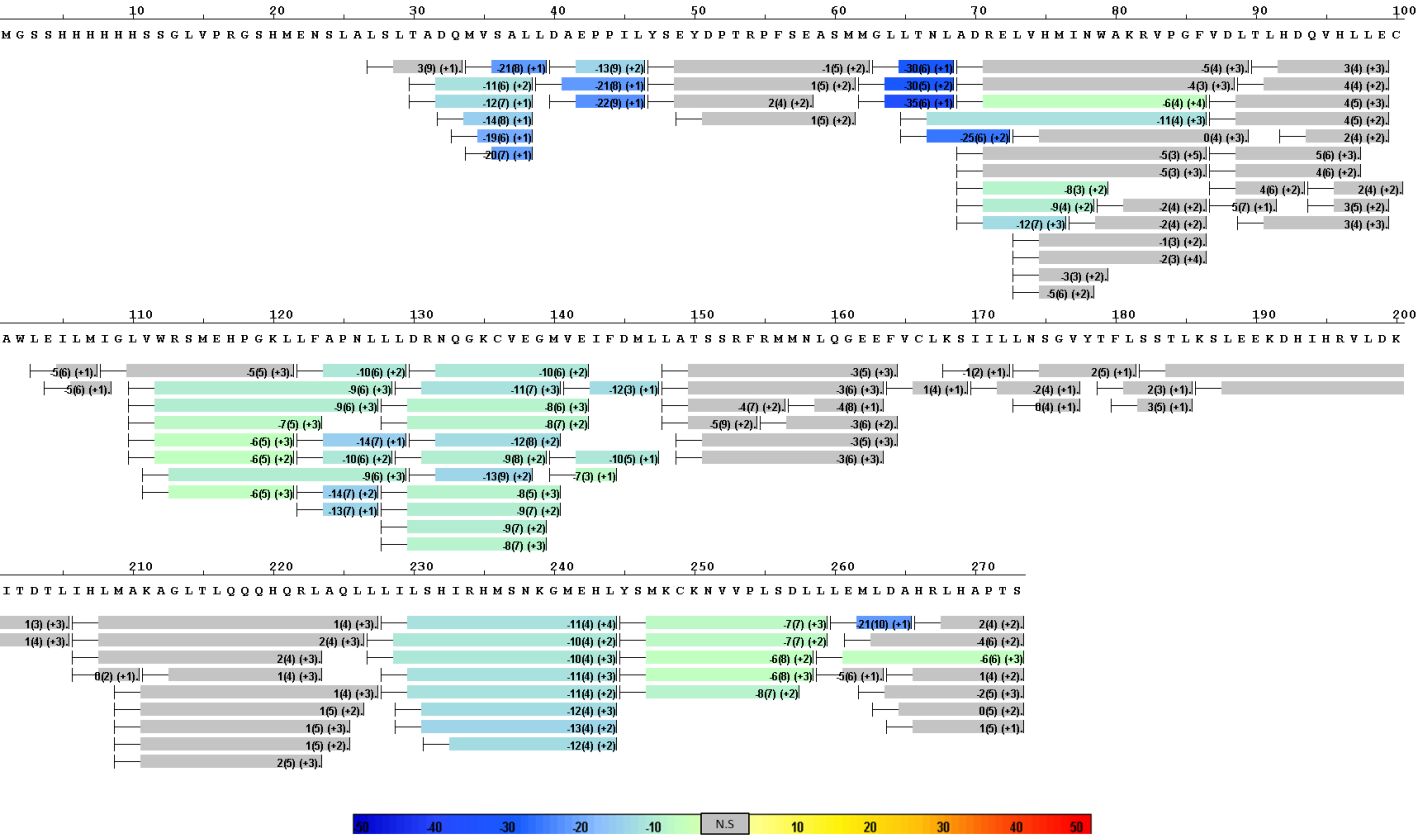

Supplement: supp [file elife_poa_e12792_Figure_4_figure_supplement_2.pdf › elife_poa_e12792_Figure_4_figure_supplement_2.pdf]

D538G-E2

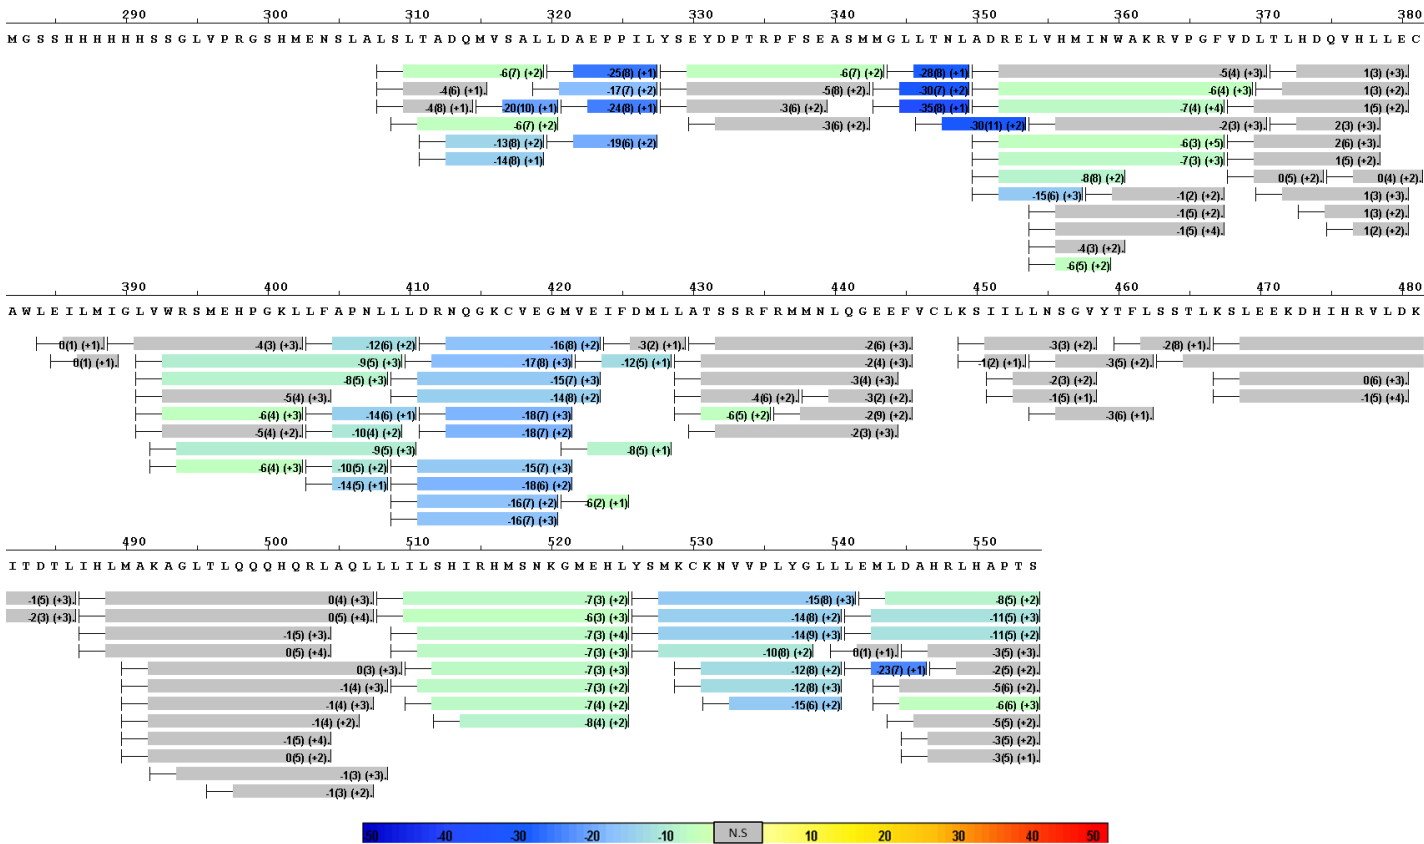

Supplement: supp [file elife_poa_e12792_Figure_4_figure_supplement_3.pdf › elife_poa_e12792_Figure_4_figure_supplement_3.pdf]

apo WT vs Y537S

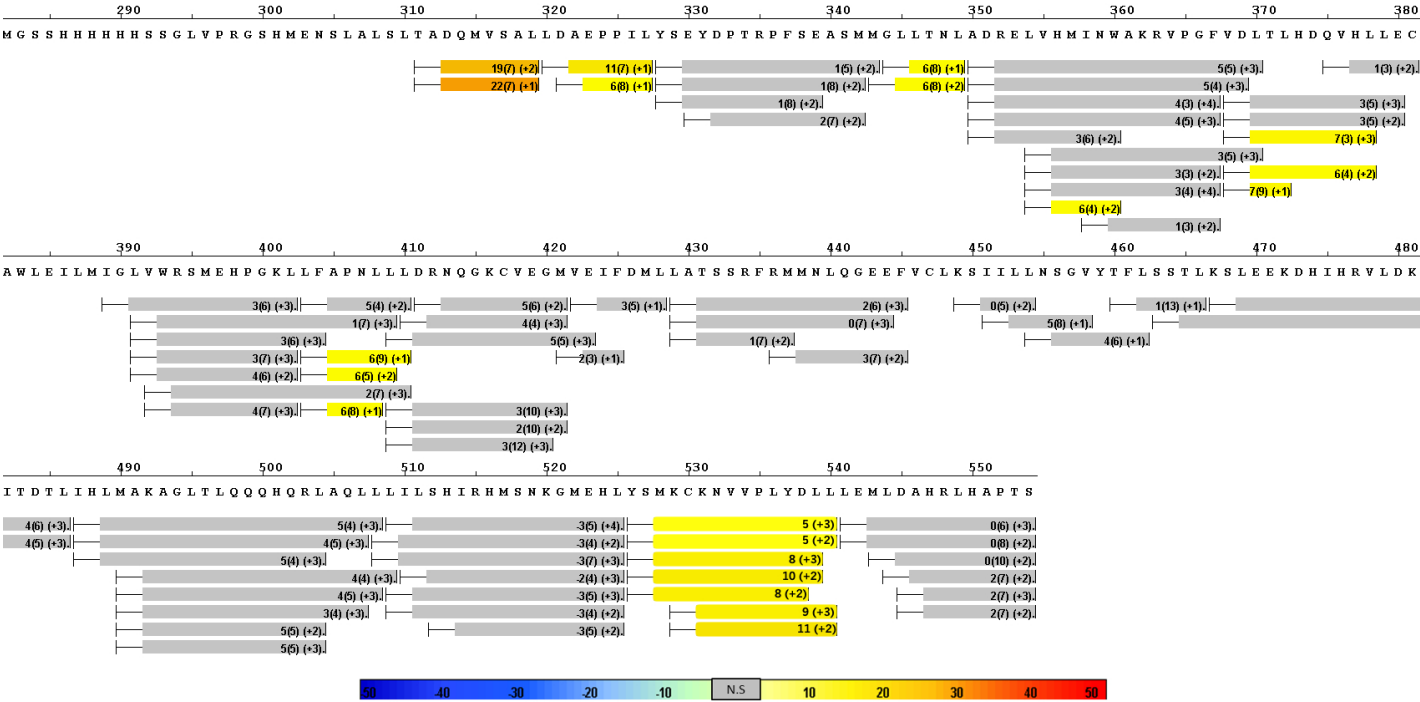

Supplement: supp [file elife_poa_e12792_Figure_4_figure_supplement_4.pdf › elife_poa_e12792_Figure_4_figure_supplement_4.pdf]

apo WT vs D538G

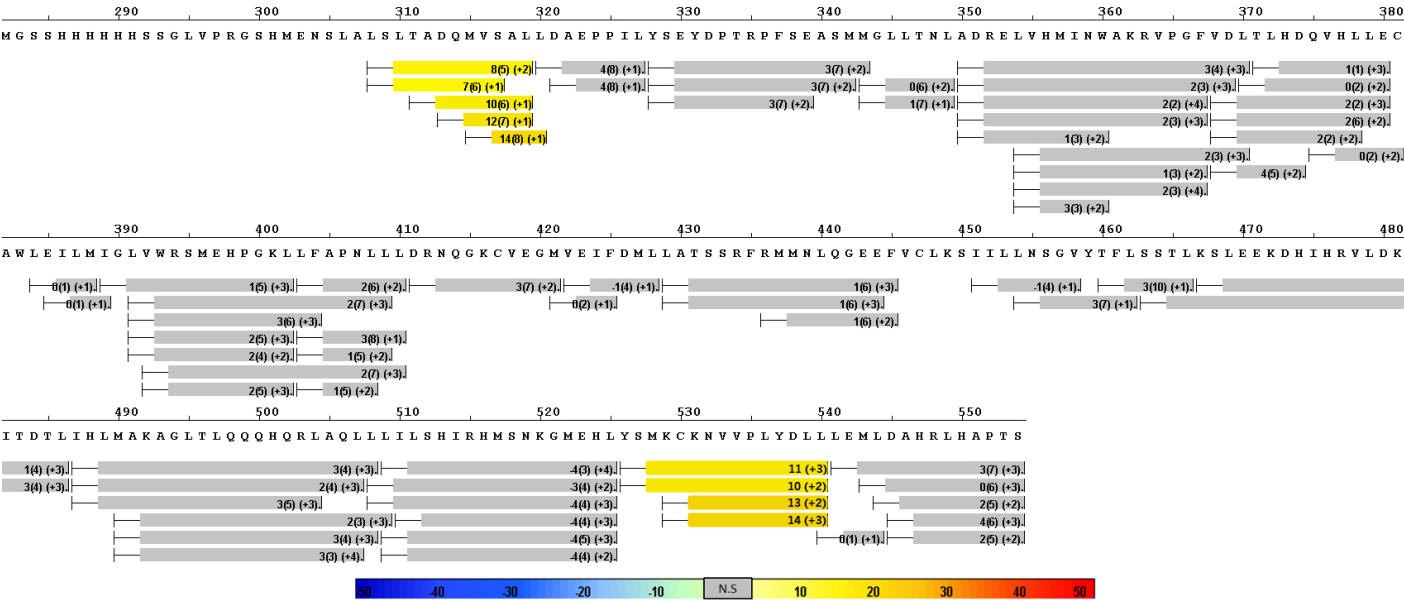

Supplement: supp [file elife_poa_e12792_Figure_4_figure_supplement_5.pdf › elife_poa_e12792_Figure_4_figure_supplement_5.pdf]

WT-SRC3

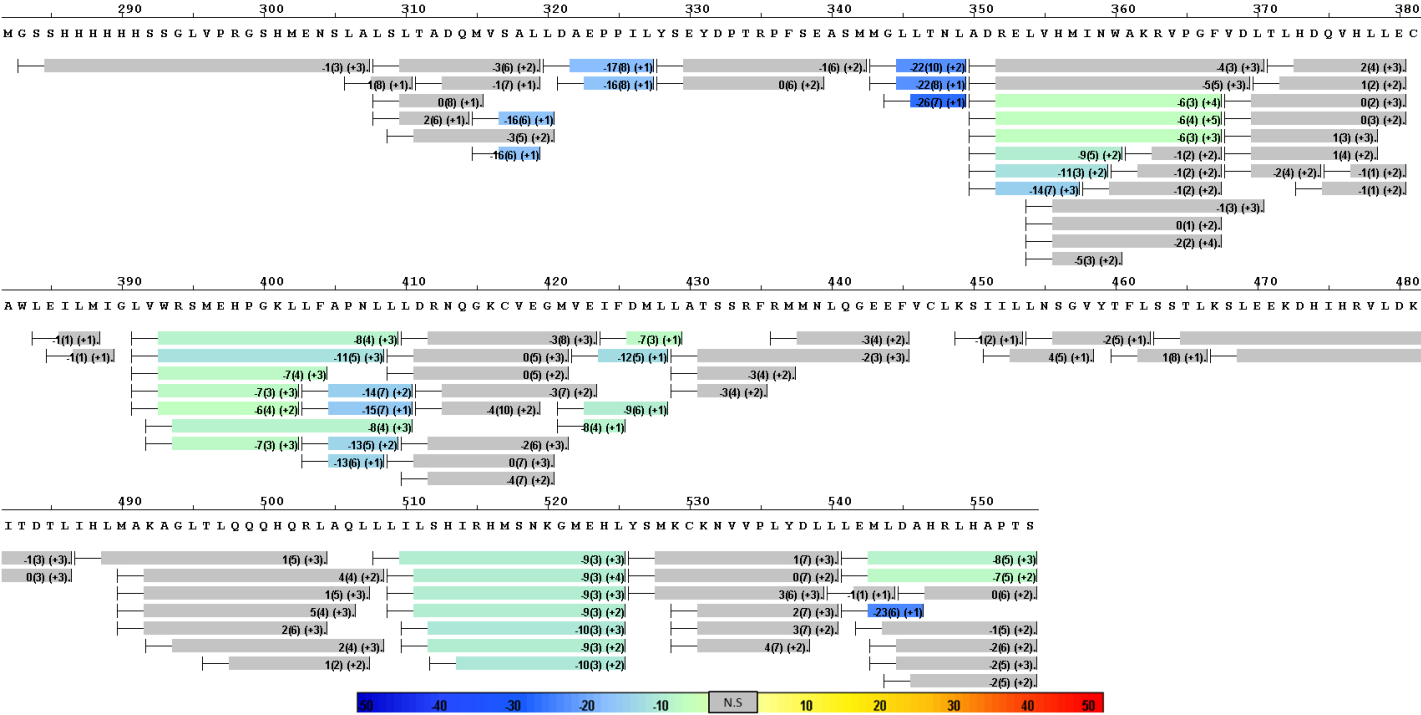

Supplement: supp [file elife_poa_e12792_Figure_4_figure_supplement_6.pdf › elife_poa_e12792_Figure_4_figure_supplement_6.pdf]

Y537S-SRC3

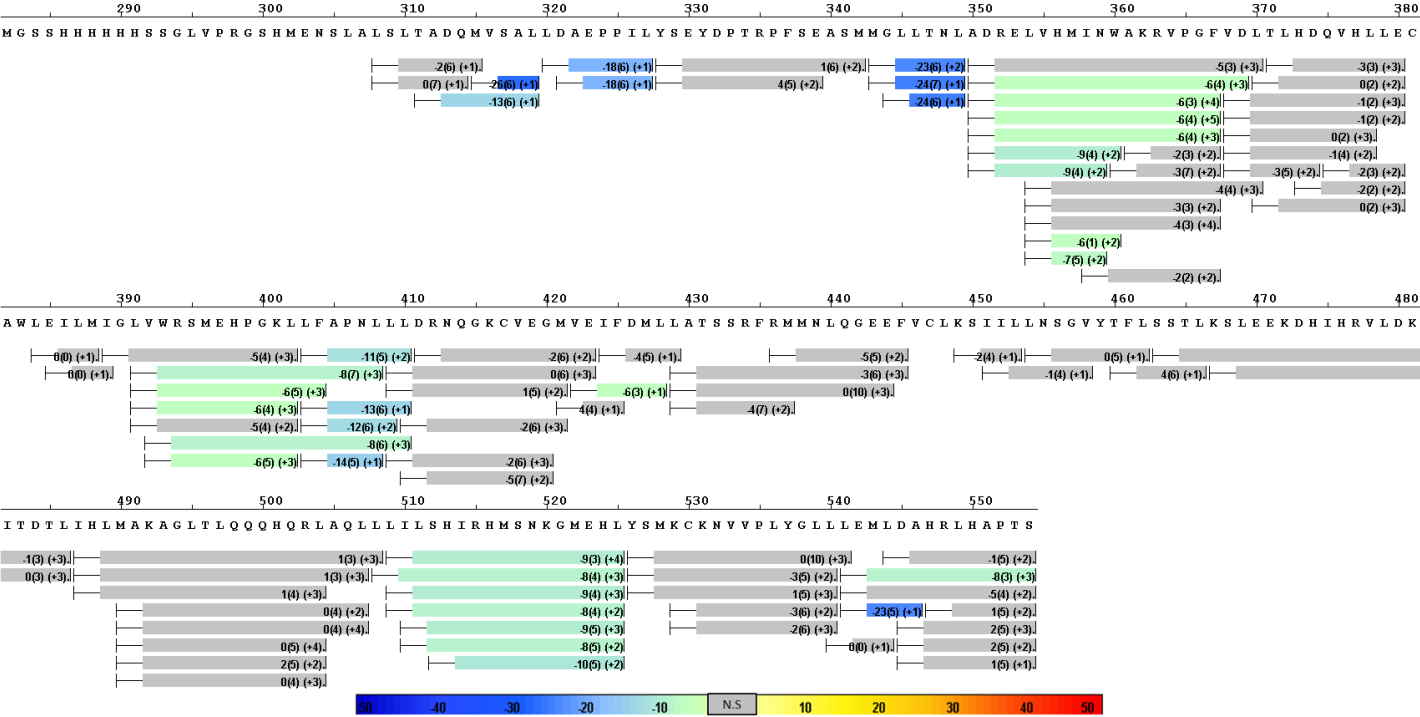

Supplement: supp [file elife_poa_e12792_Figure_4_figure_supplement_7.pdf › elife_poa_e12792_Figure_4_figure_supplement_7.pdf]

D538G-SRC3

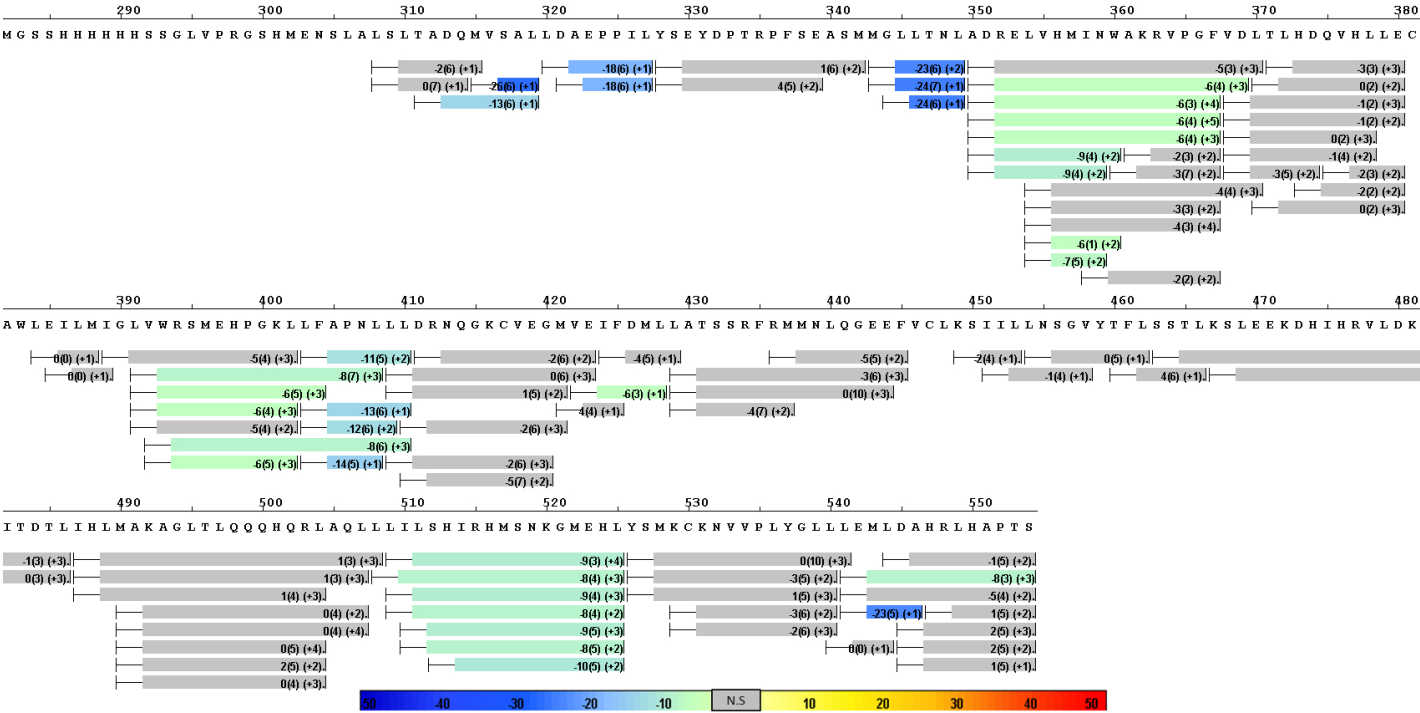

Supplement: supp [file elife_poa_e12792_Figure_4_figure_supplement_8.pdf › elife_poa_e12792_Figure_4_figure_supplement_8.pdf]

WT-E2-SRC3

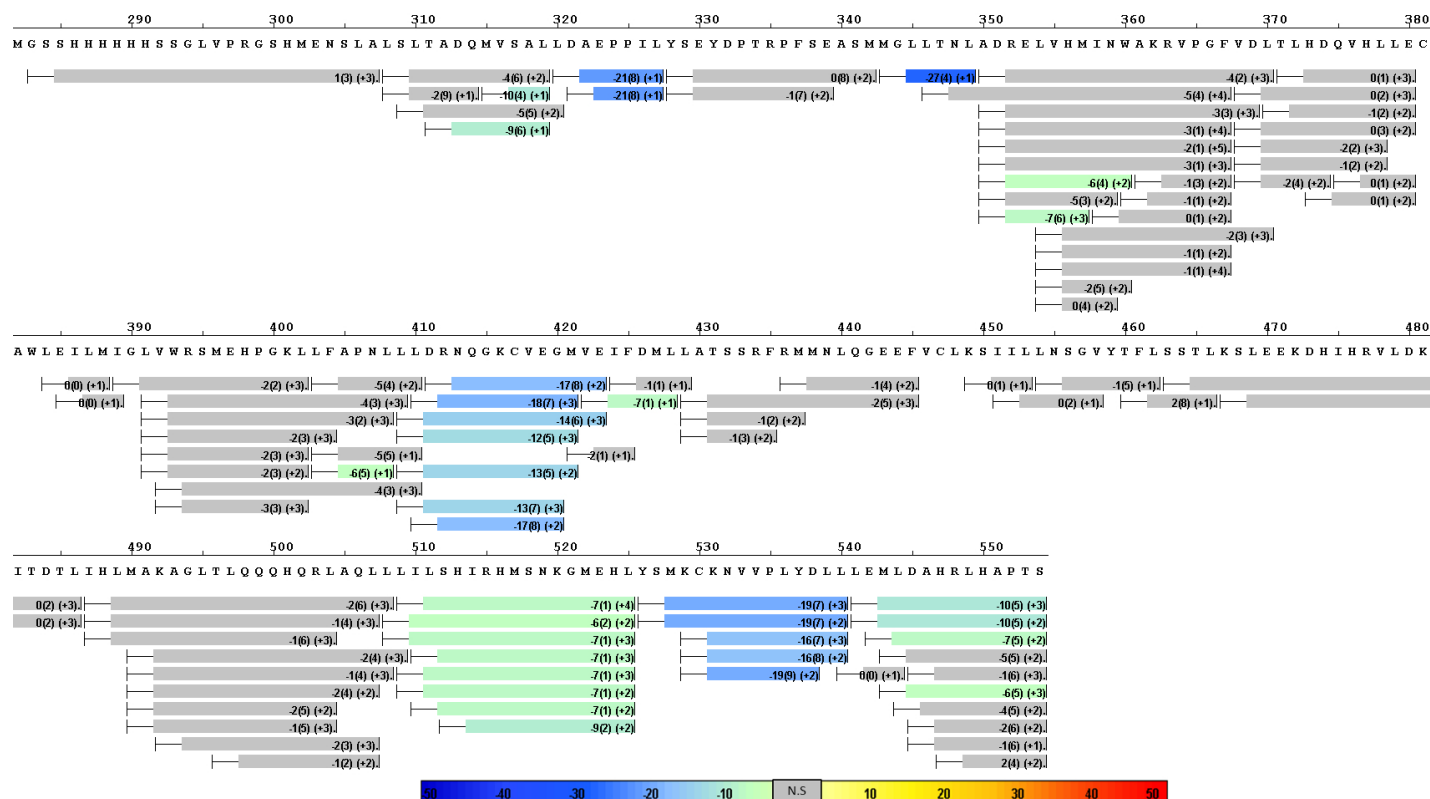

Supplement: supp [file elife_poa_e12792_Figure_4_figure_supplement_9.pdf › elife_poa_e12792_Figure_4_figure_supplement_9.pdf]

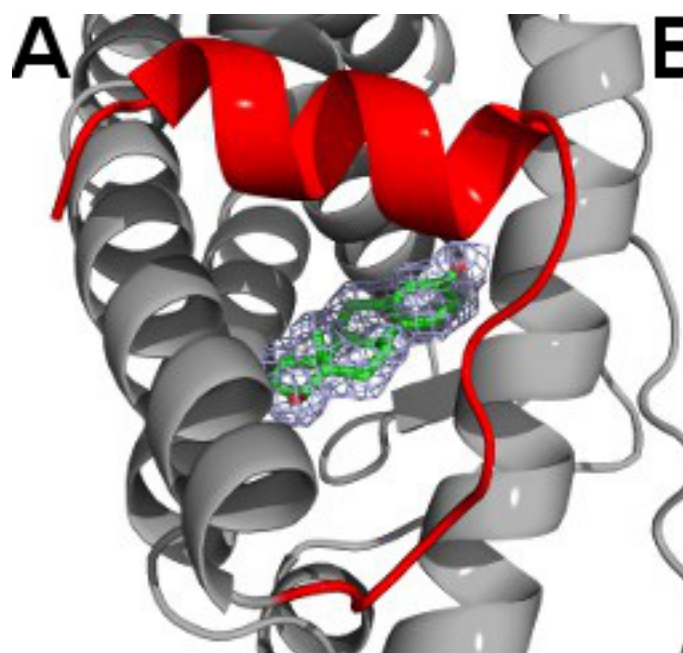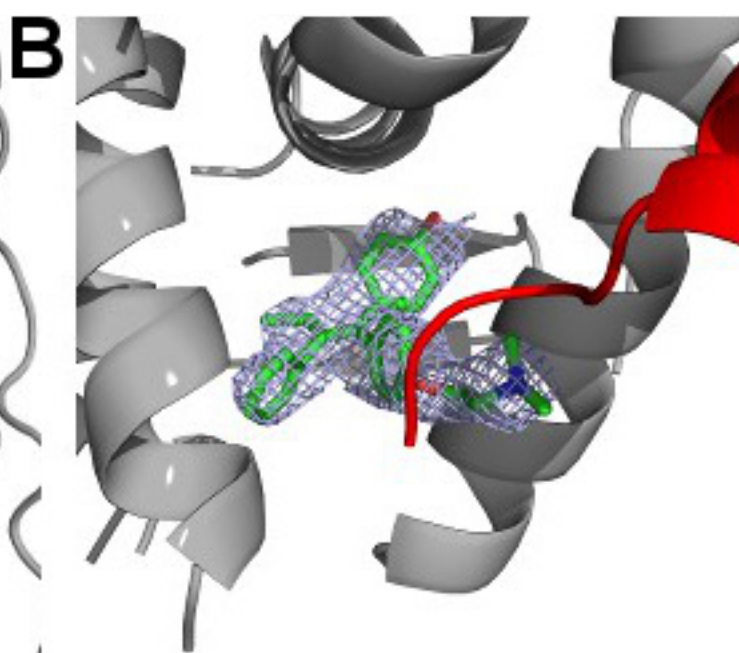

Supplement: supp [file elife_poa_e12792_Figure_5_figure_supplement_1.pdf › elife_poa_e12792_Figure_5_figure_supplement_1.pdf]

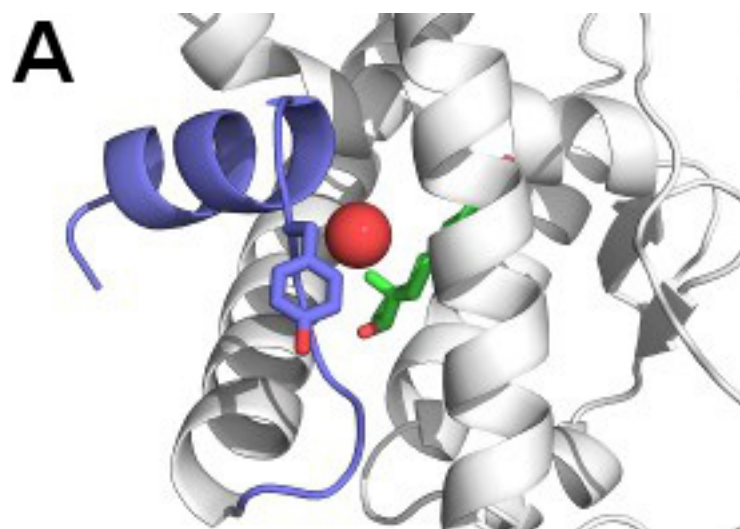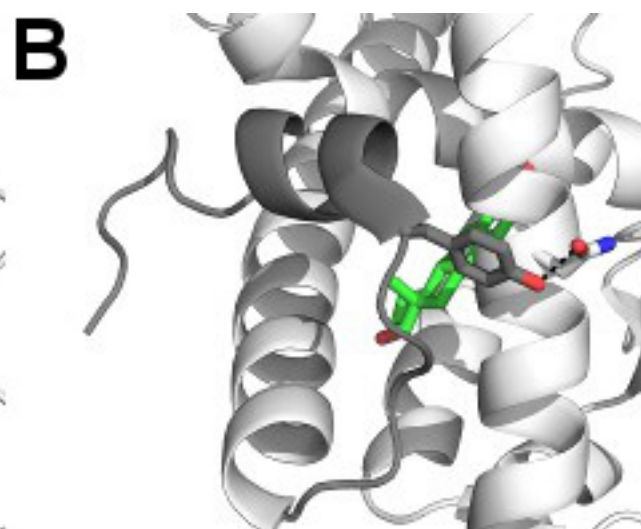

Supplement: supp [file elife_poa_e12792_Figure_5_figure_supplement_2.pdf › elife_poa_e12792_Figure_5_figure_supplement_2.pdf]

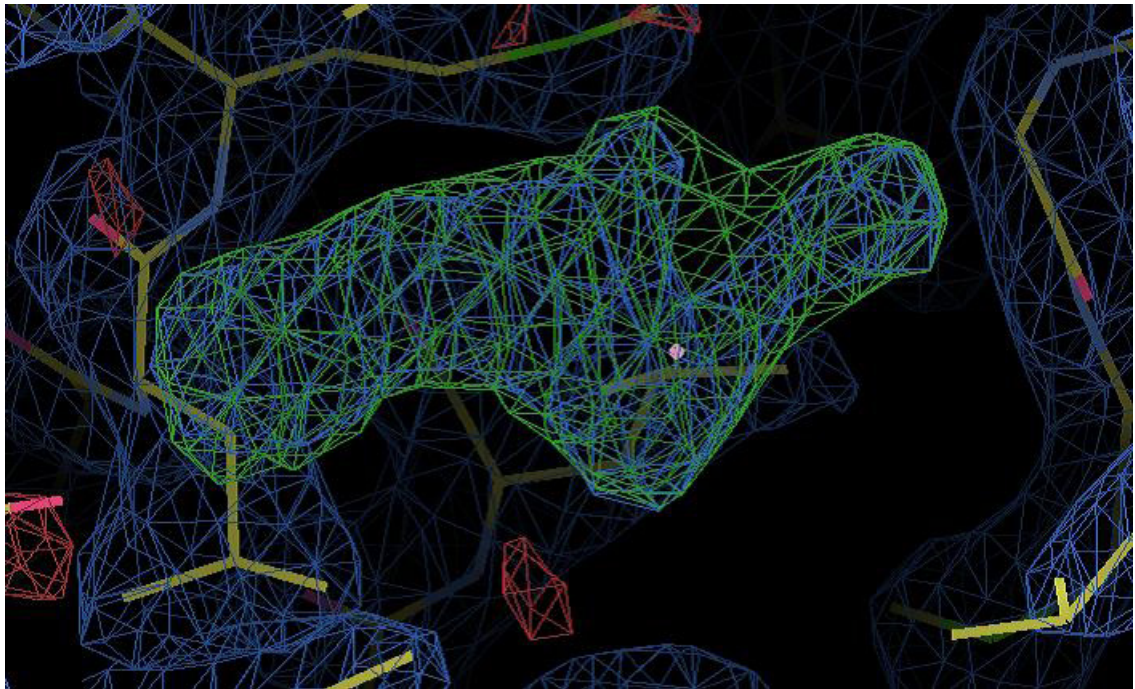

Supplement: supp [file elife_poa_e12792_Figure_5_figure_supplement_3.pdf › elife_poa_e12792_Figure_5_figure_supplement_3.pdf]

# WT-TOT

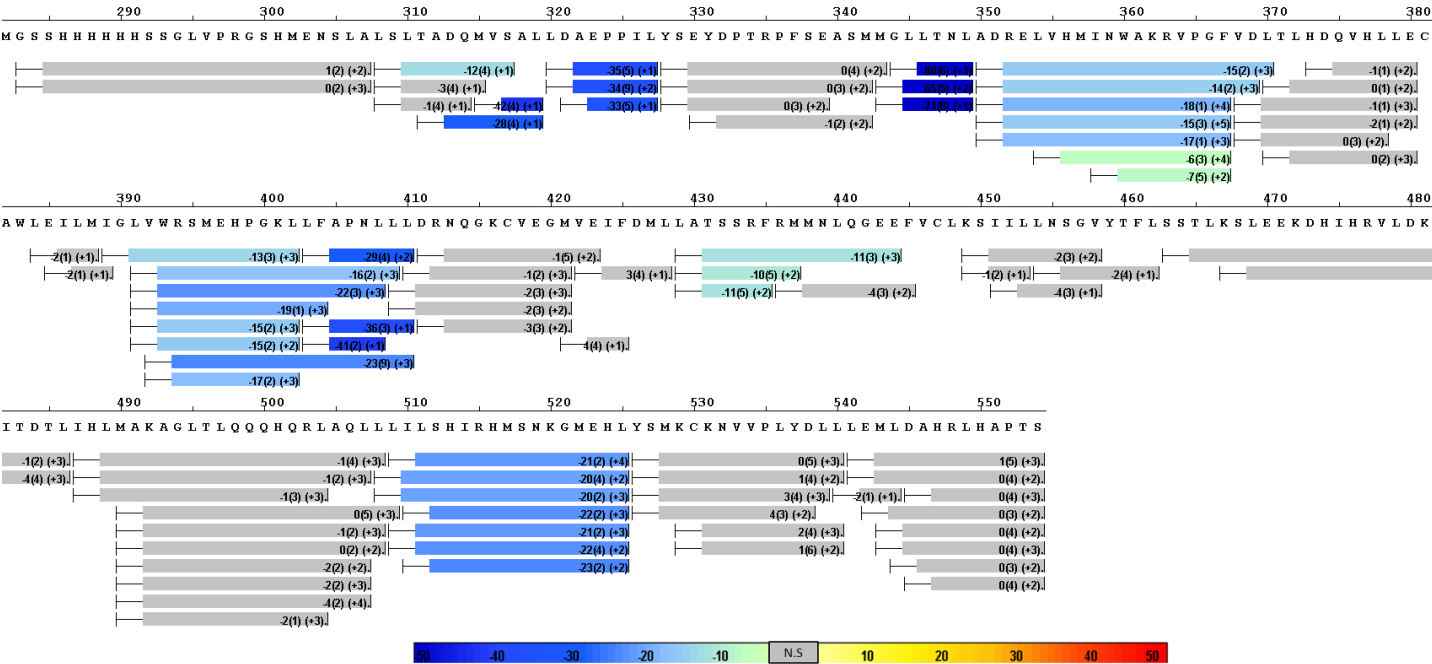

Supplement: supp [file elife_poa_e12792_Figure_7_figure_supplement_1.pdf › elife_poa_e12792_Figure_7_figure_supplement_1.pdf]

Y537S-TOT

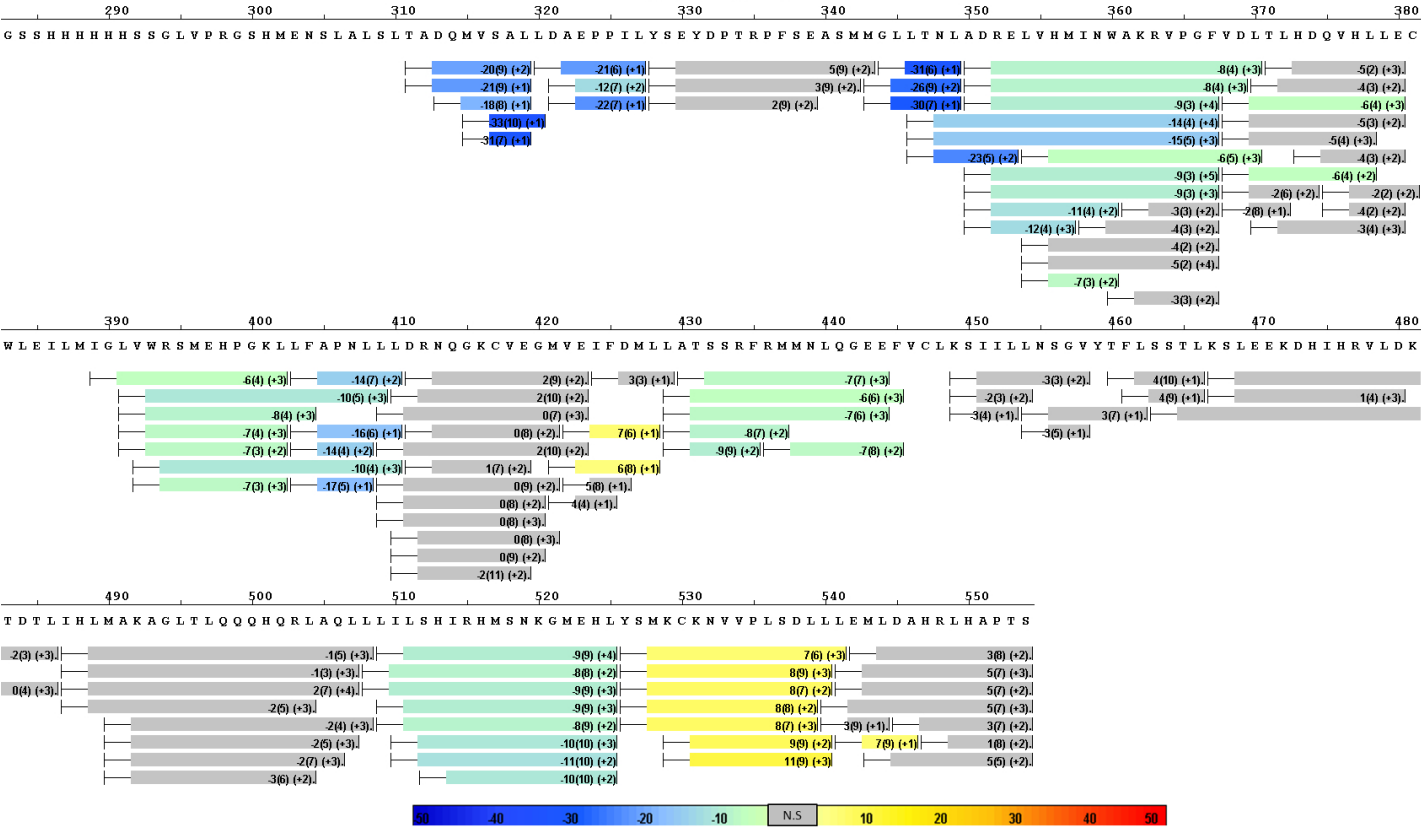

Supplement: supp [file elife_poa_e12792_Figure_7_figure_supplement_2.pdf › elife_poa_e12792_Figure_7_figure_supplement_2.pdf]

D538G-TOT

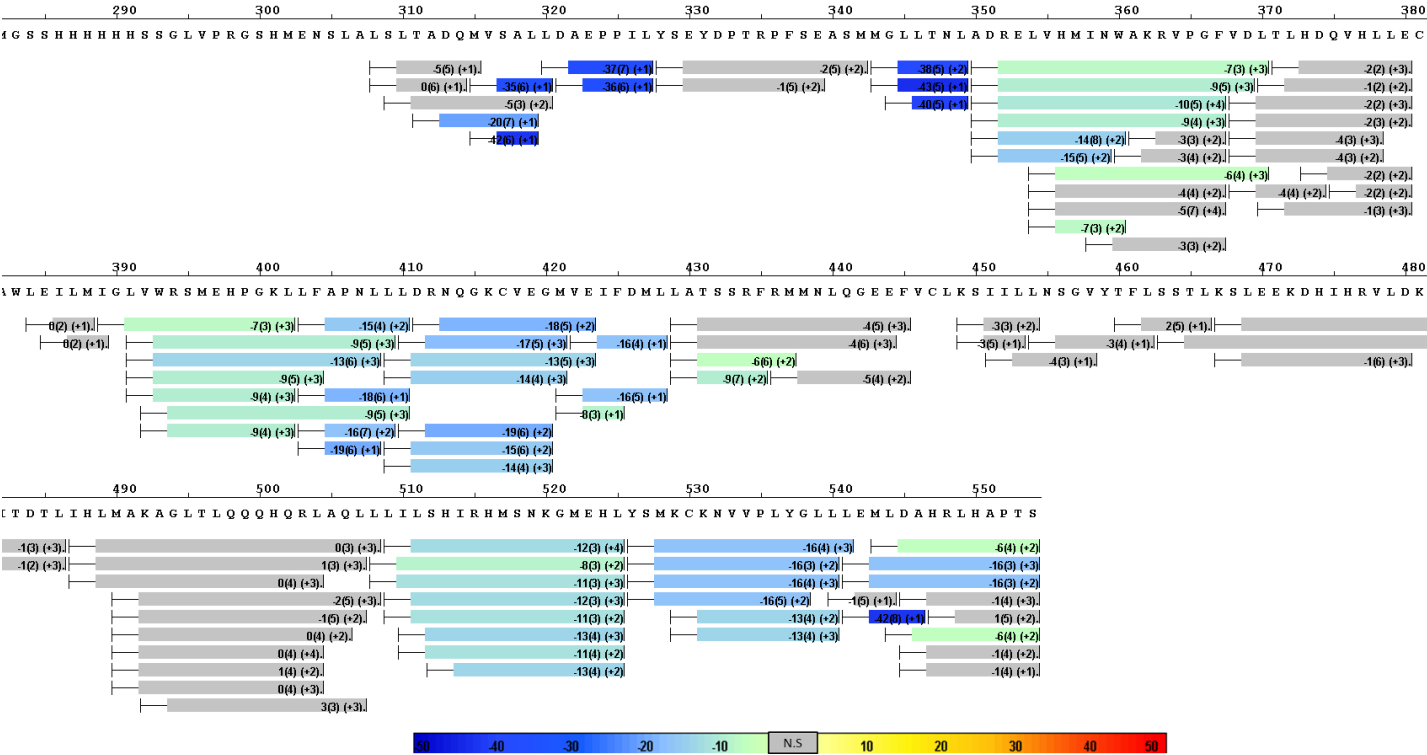

Supplement: supp [file elife_poa_e12792_Figure_7_figure_supplement_3.pdf › elife_poa_e12792_Figure_7_figure_supplement_3.pdf]
